# Supplementary material for: Electrodeposited Ni(OH)2-modified CuS core–shell-like hybrids as binder-free electrodes for high-performance supercapacitors
Source: Royal Society of Chemistry journal article supplement (doi:10.1039/c9nj03593a), 2019-01-01
Supplement: c9nj03593a1.pdf [file c9nj03593a1.pdf]

**Electrodeposited Ni(OH)<sub>2</sub> modified CuS Core-shell like hybrids as binder-free  
electrodes for high-performance supercapacitors**

**P. Naveenkumar and G. Paruthimal Kalaignan\***

Department of Industrial Chemistry, Alagappa University, Karaikudi-630 003, Tamilnadu,  
India.

\*Corresponding Author Phone No: +91-9443135307, Email id: pkalaignan@yahoo.com

**Supporting Information**

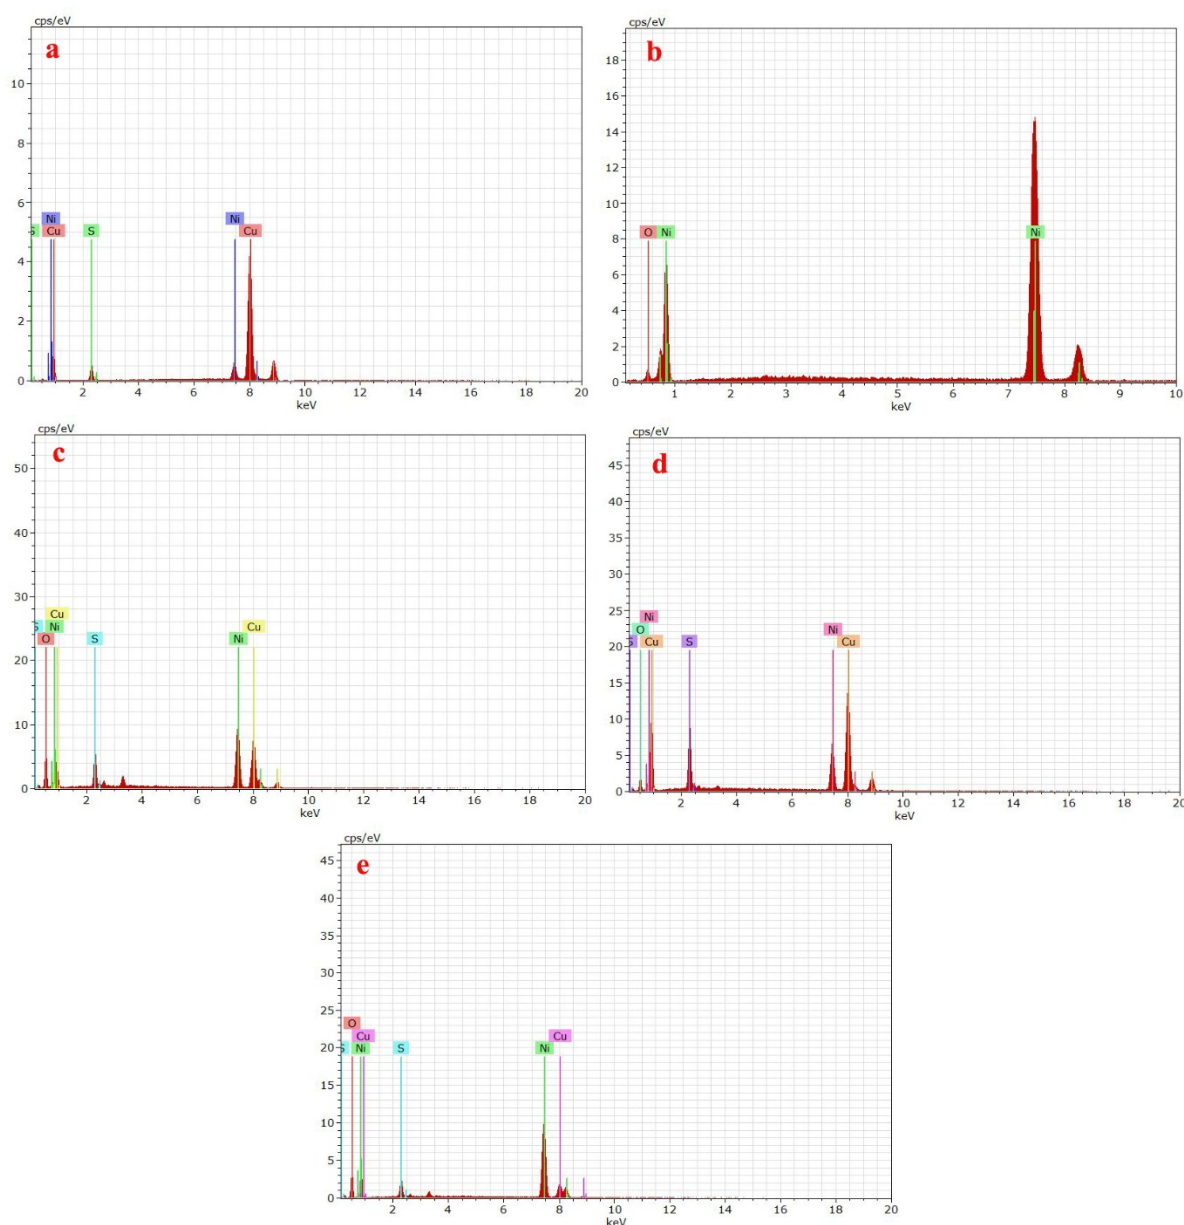

**Figure. S1 EDAX Spectrum of (a) CS, (b) Ni(OH)<sub>2</sub>, (c) CS-3, (d) CS-5 and (e) CS-7.**

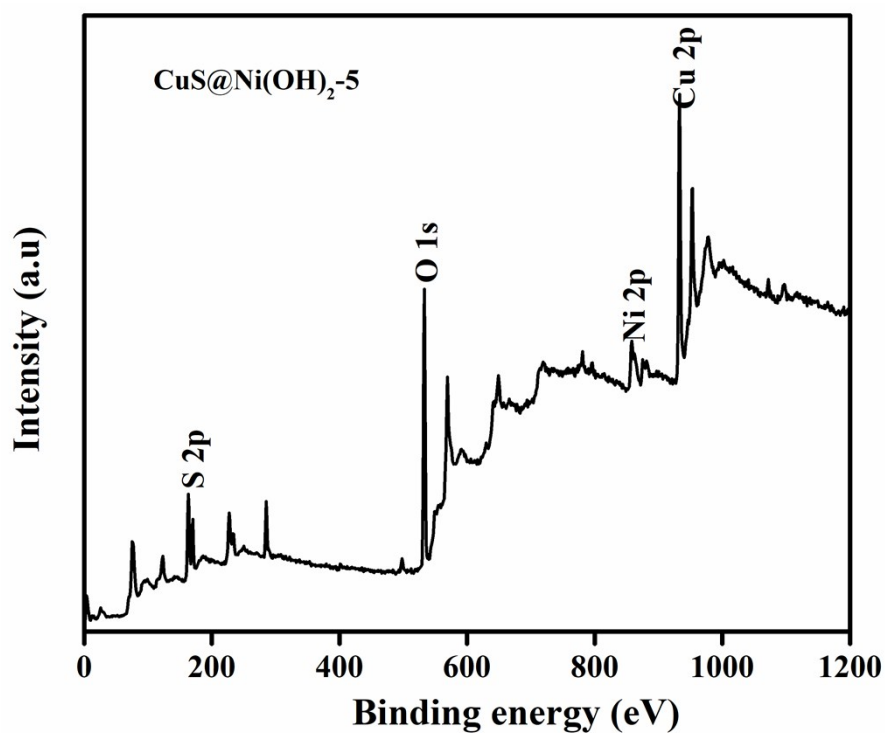

Figure. S2 XPS spectrum of CS-5 (wide scan).

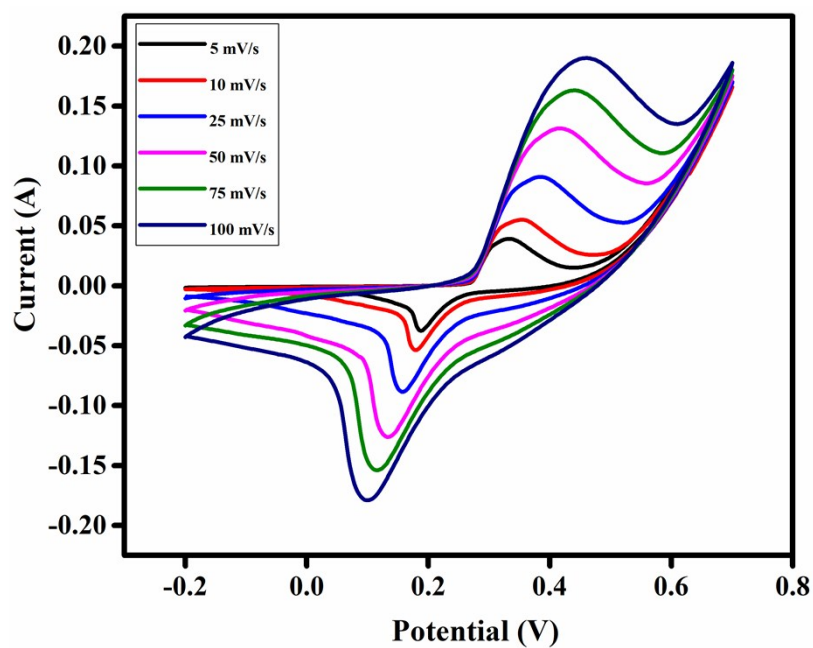

Figure. S3 Cyclic voltammetry graph of Ni(OH)<sub>2</sub>

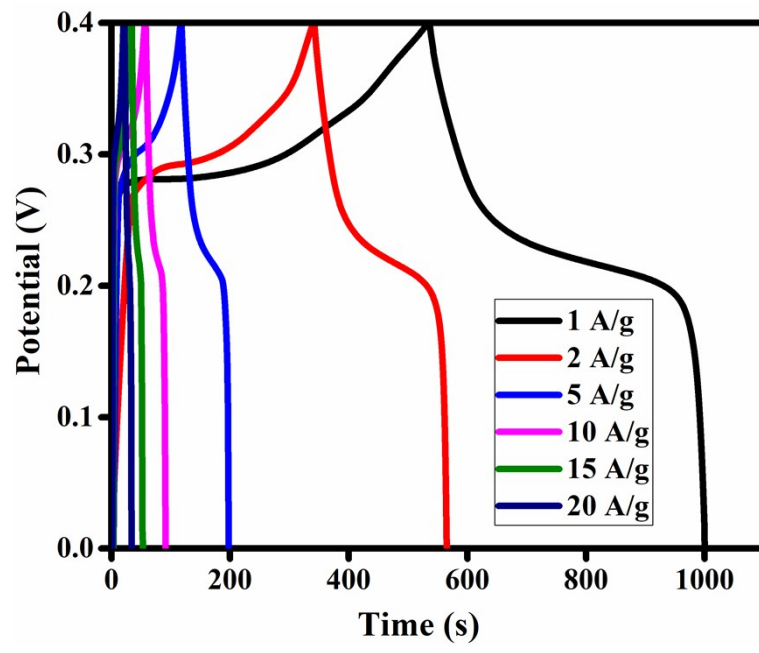

Figure. S4 DRC graph of Ni(OH)<sub>2</sub>.
